# Supplementary material
Source: PubMed Central journal article supplement (PMC2519050)
Supplement: NIHMS61888-supplement-si20061214_112.pdf [file NIHMS61888-supplement-si20061214_112.pdf]

Figure S1

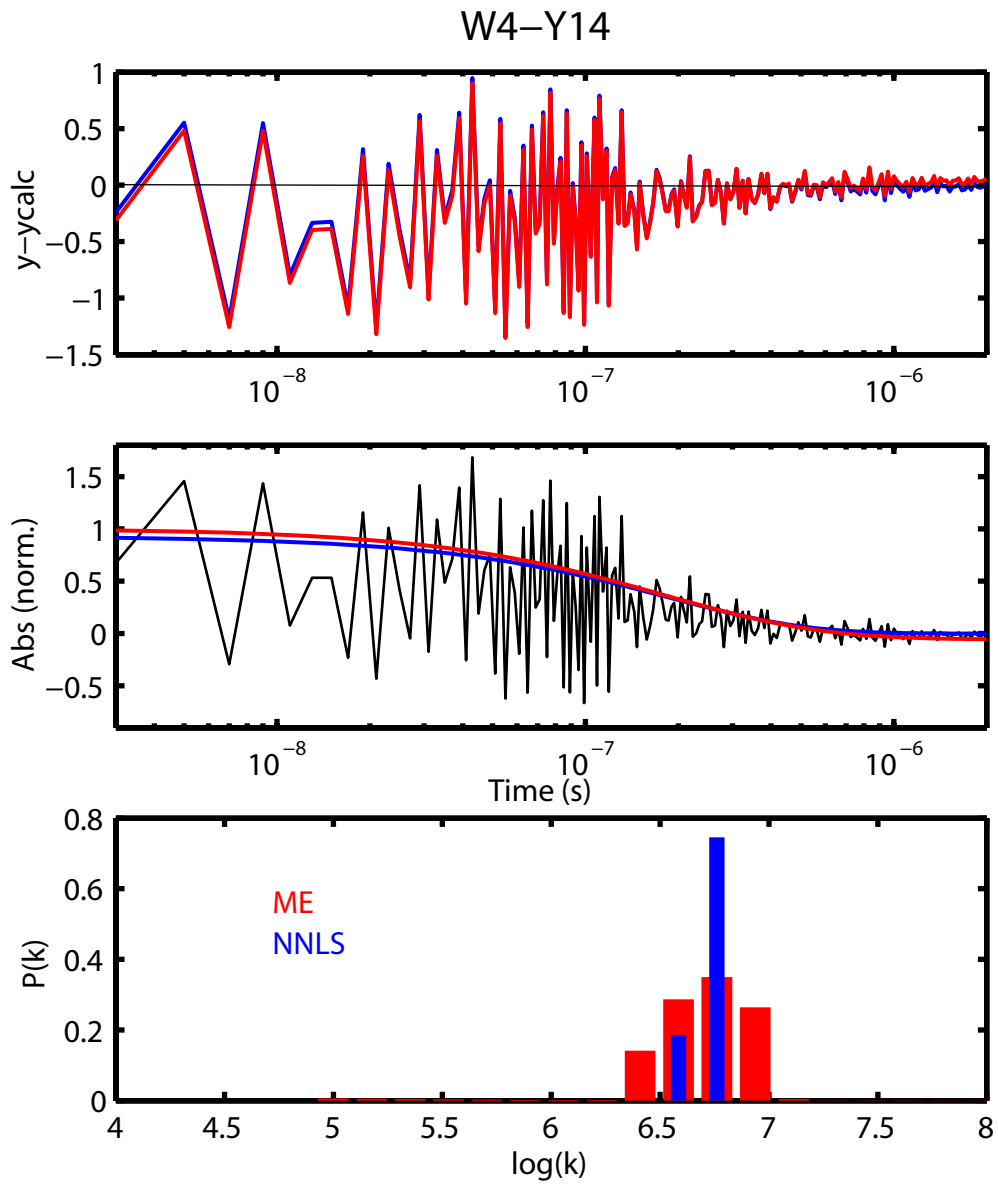

Figure S2

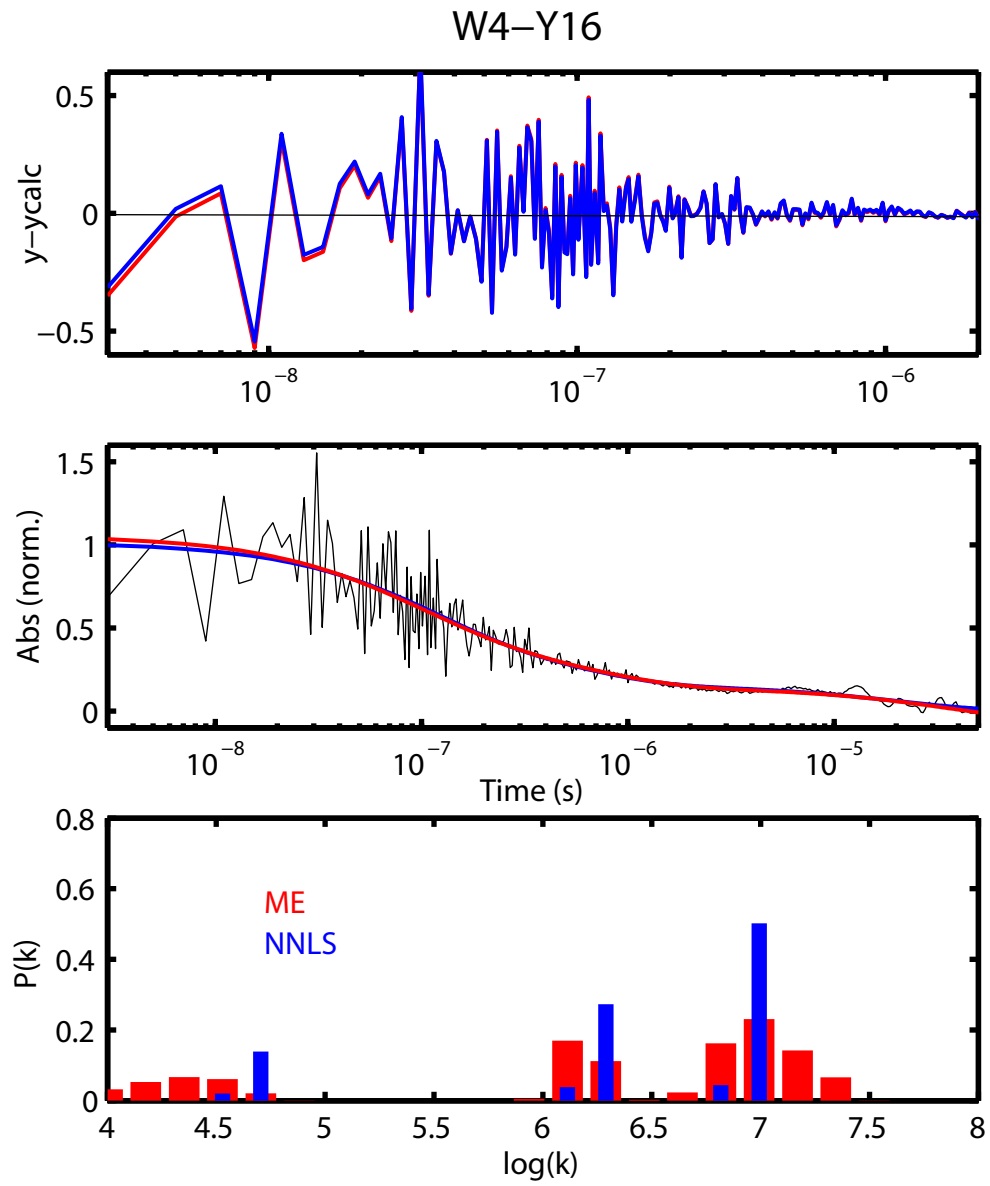

Figure S3

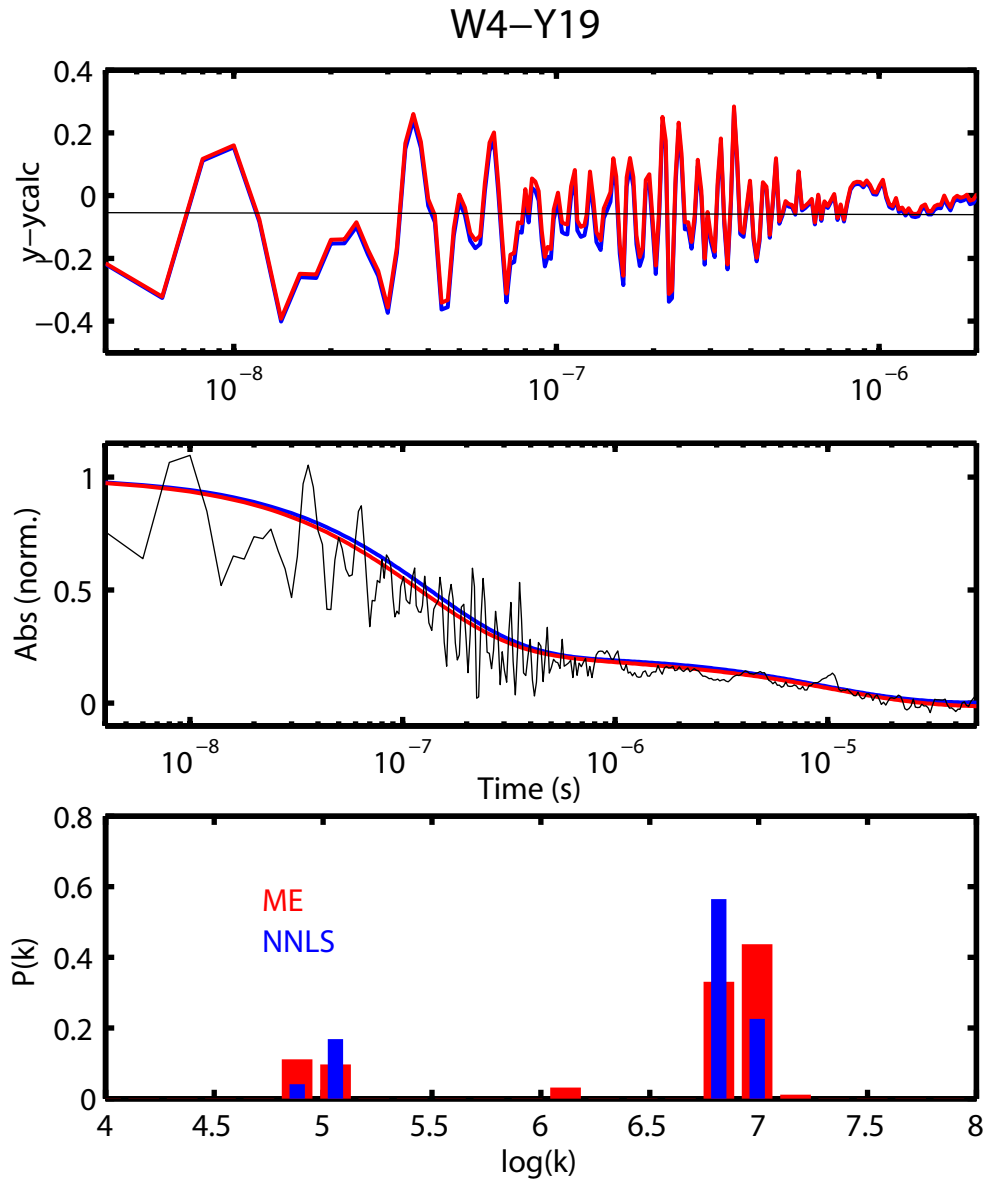

Figure S4

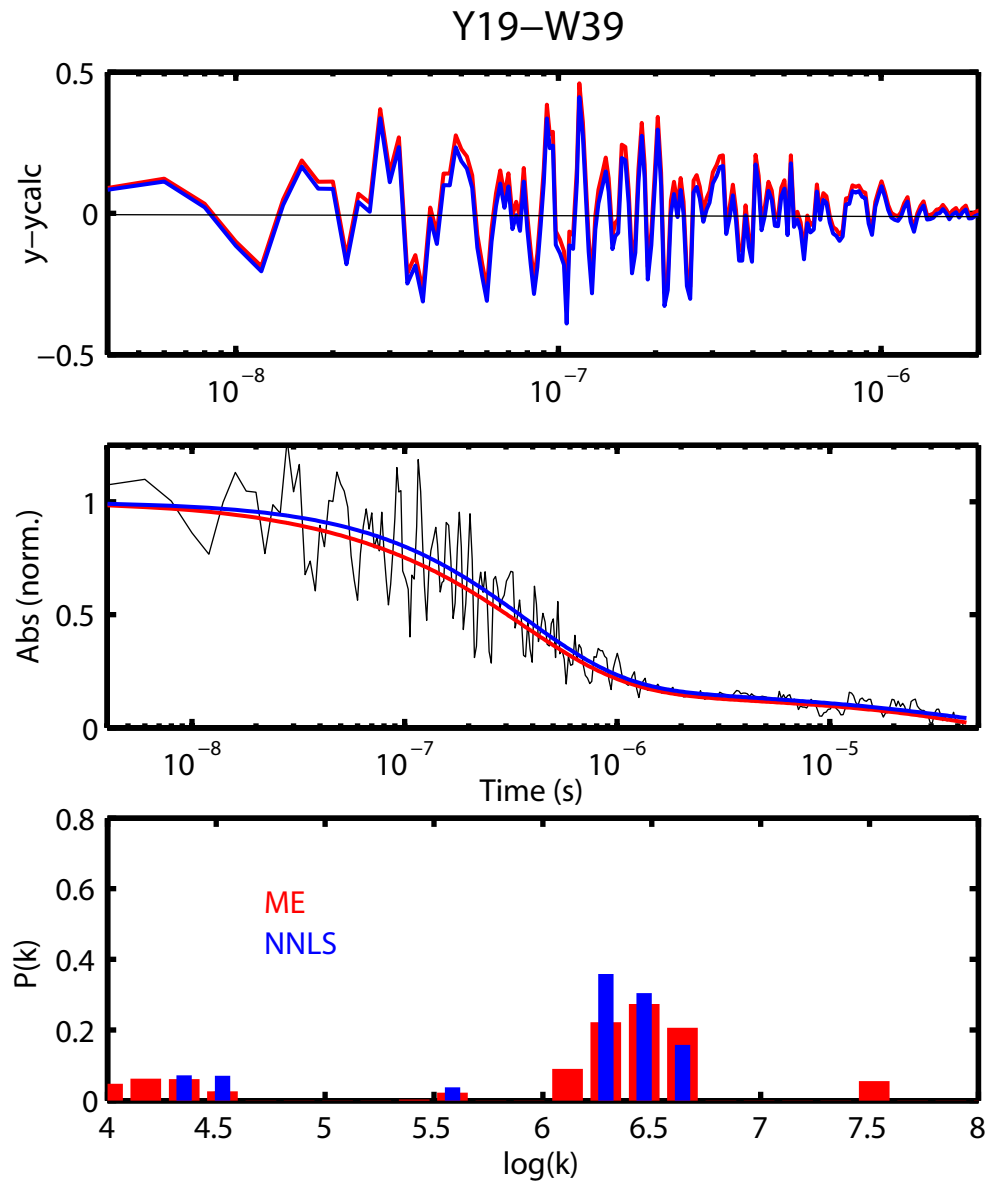

Figure S5

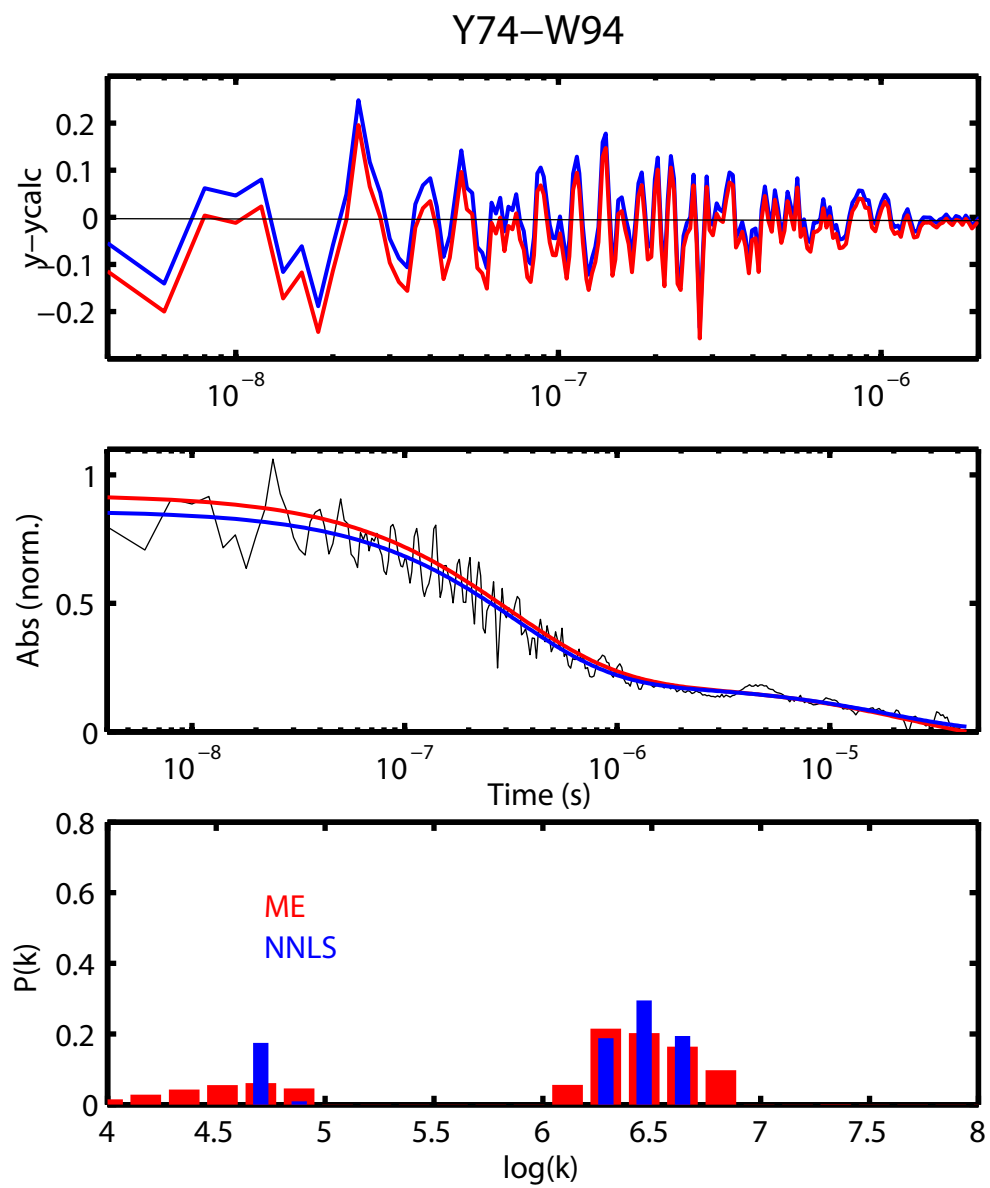

Figure S6

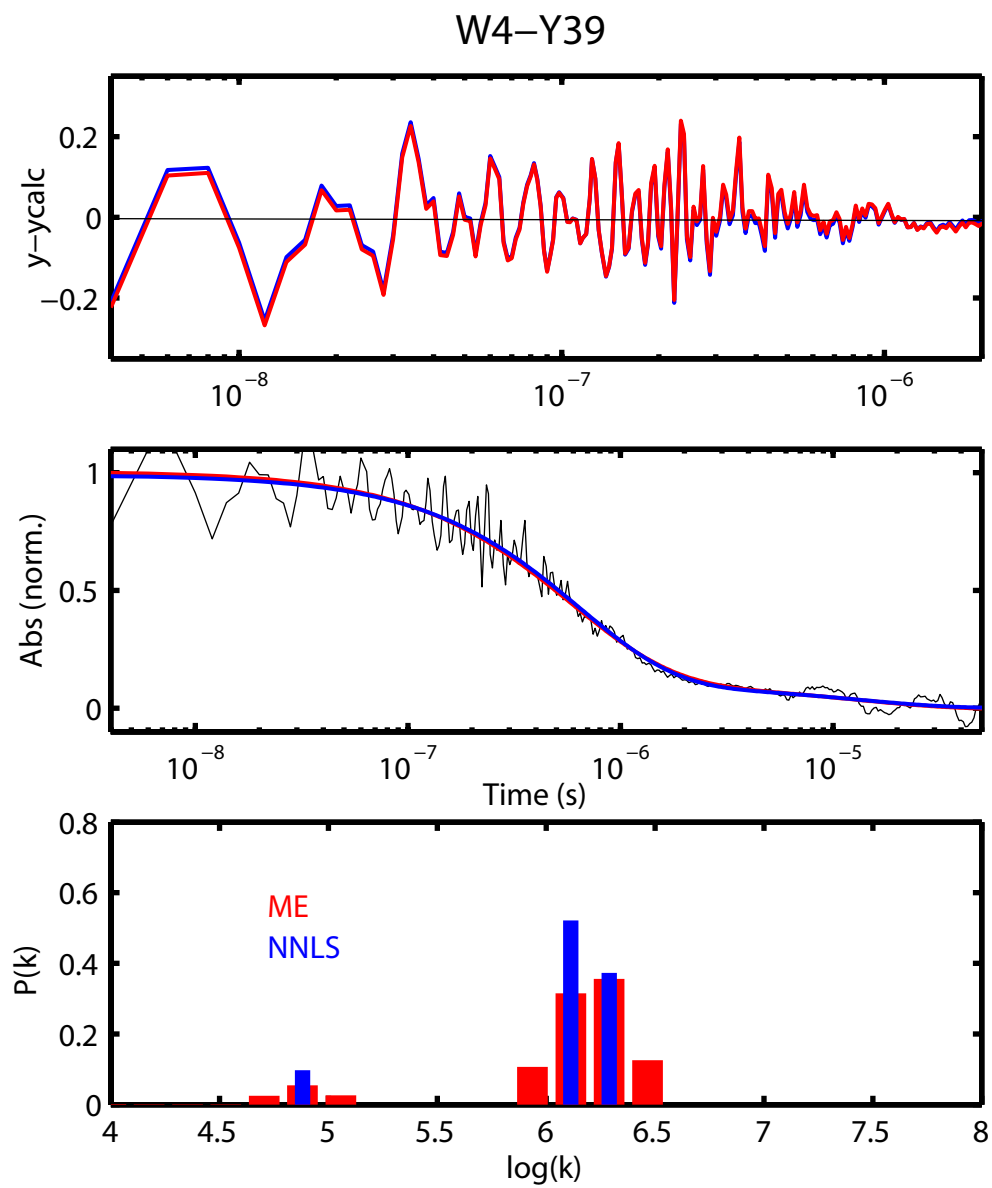

Figure S7

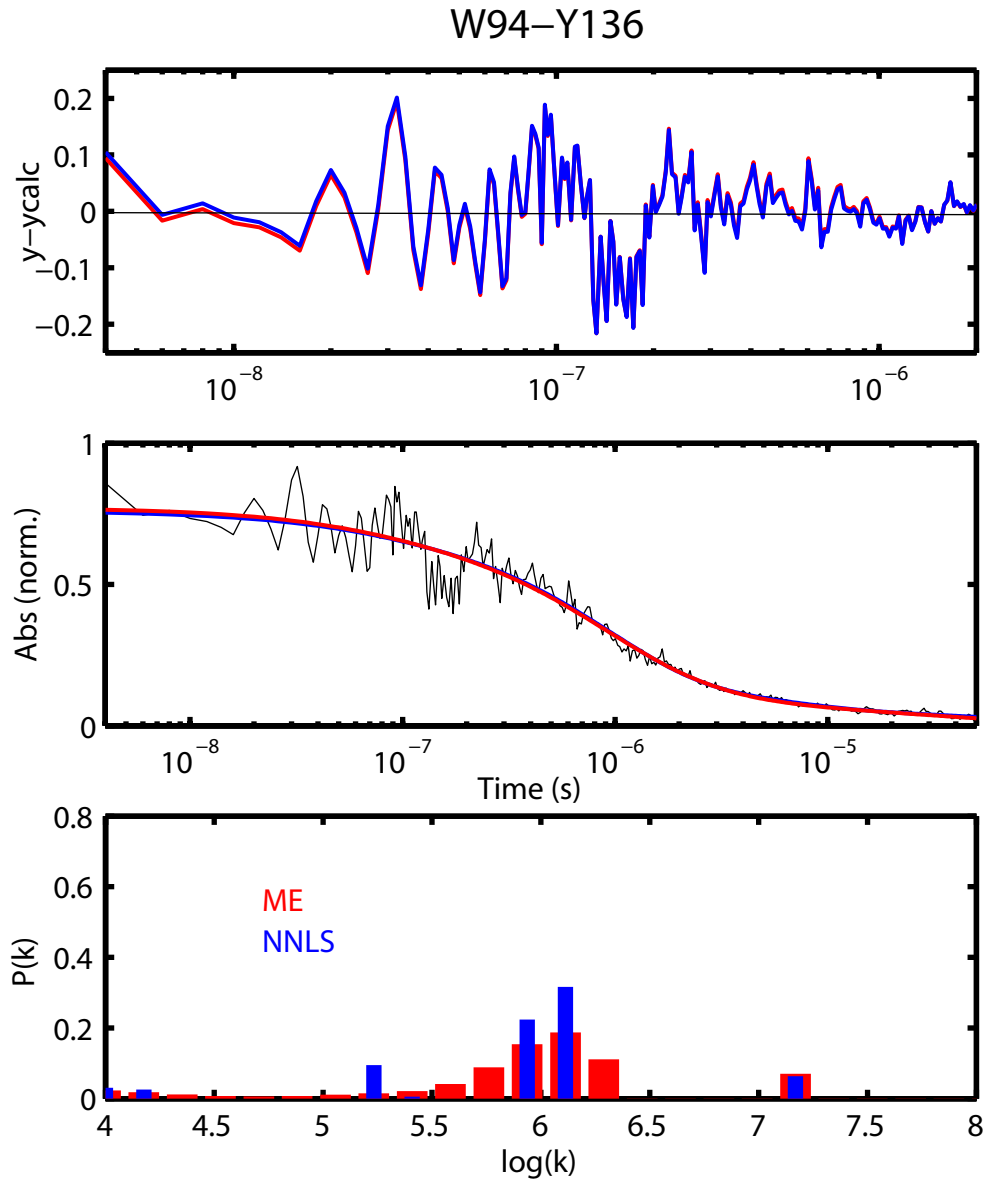

Figure S8

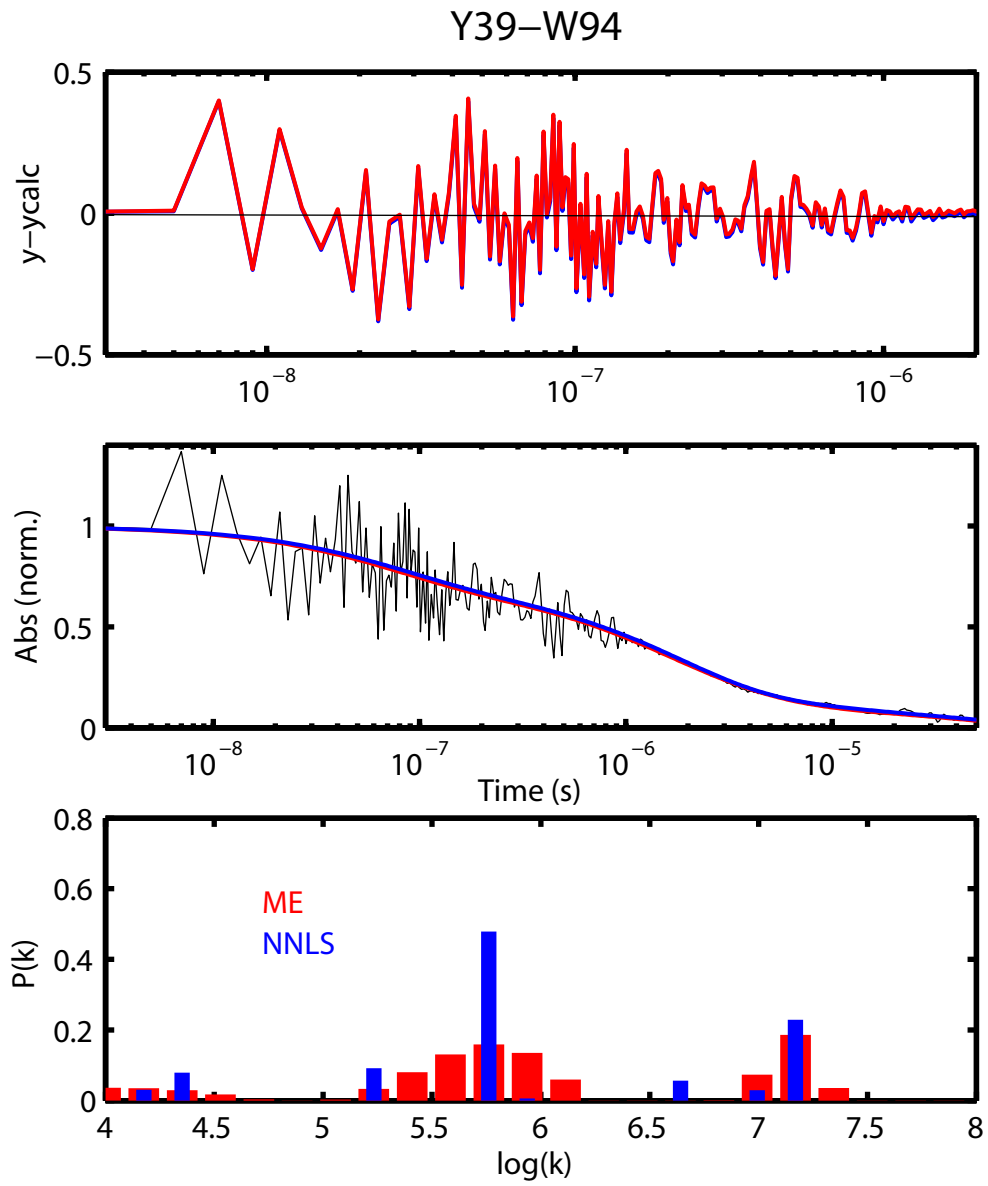



Figure S9

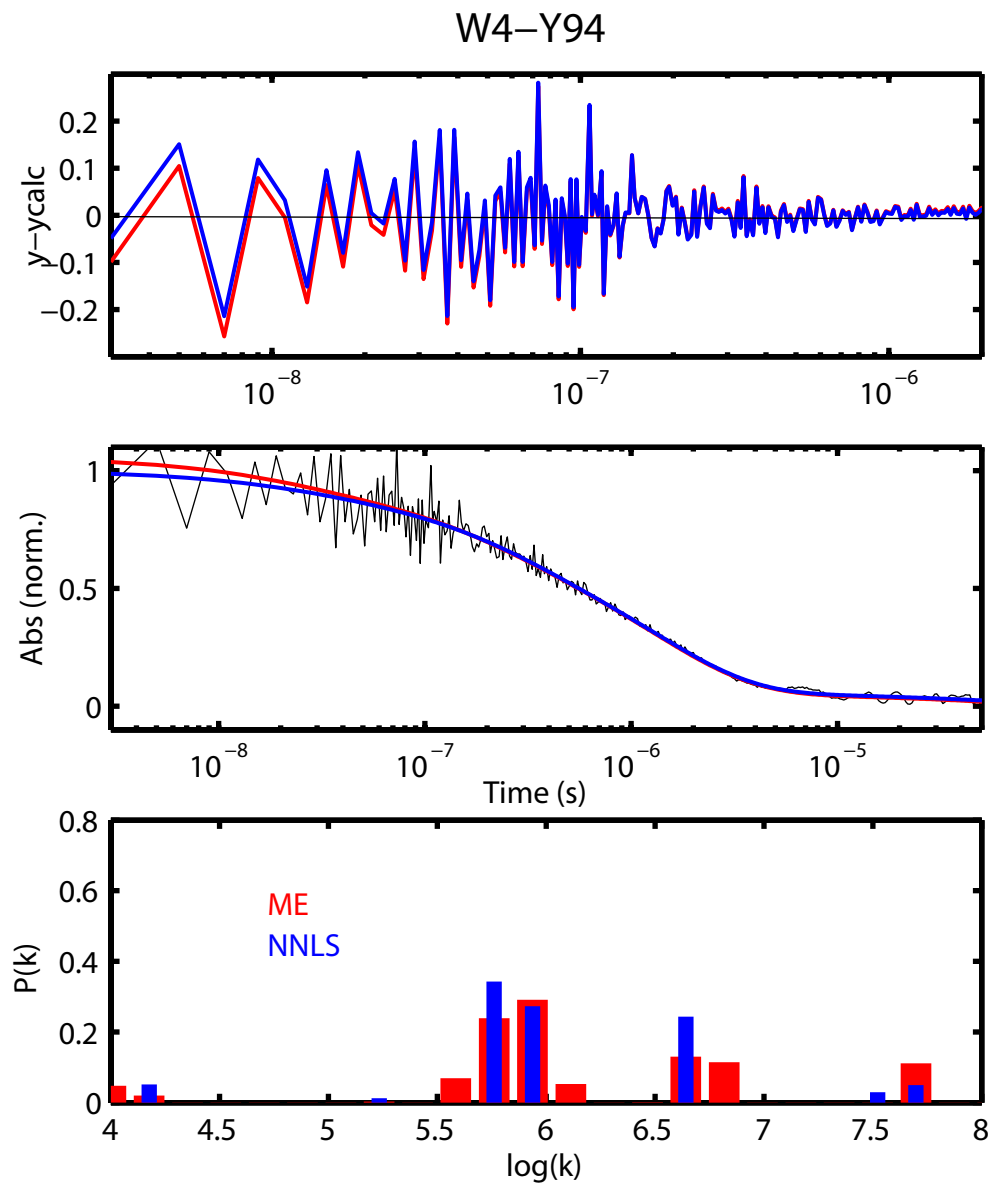

Figure S10

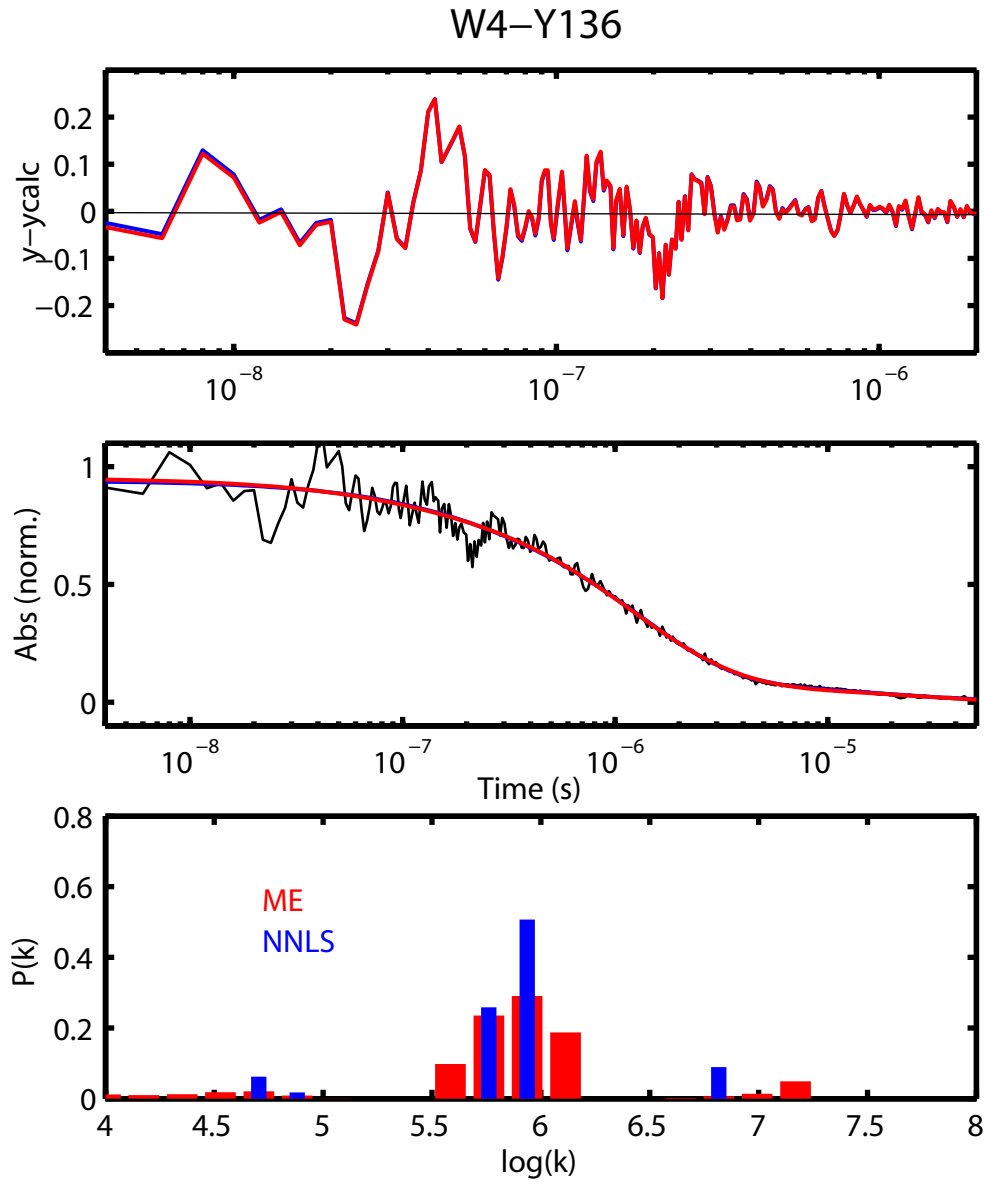

**Figure S11**

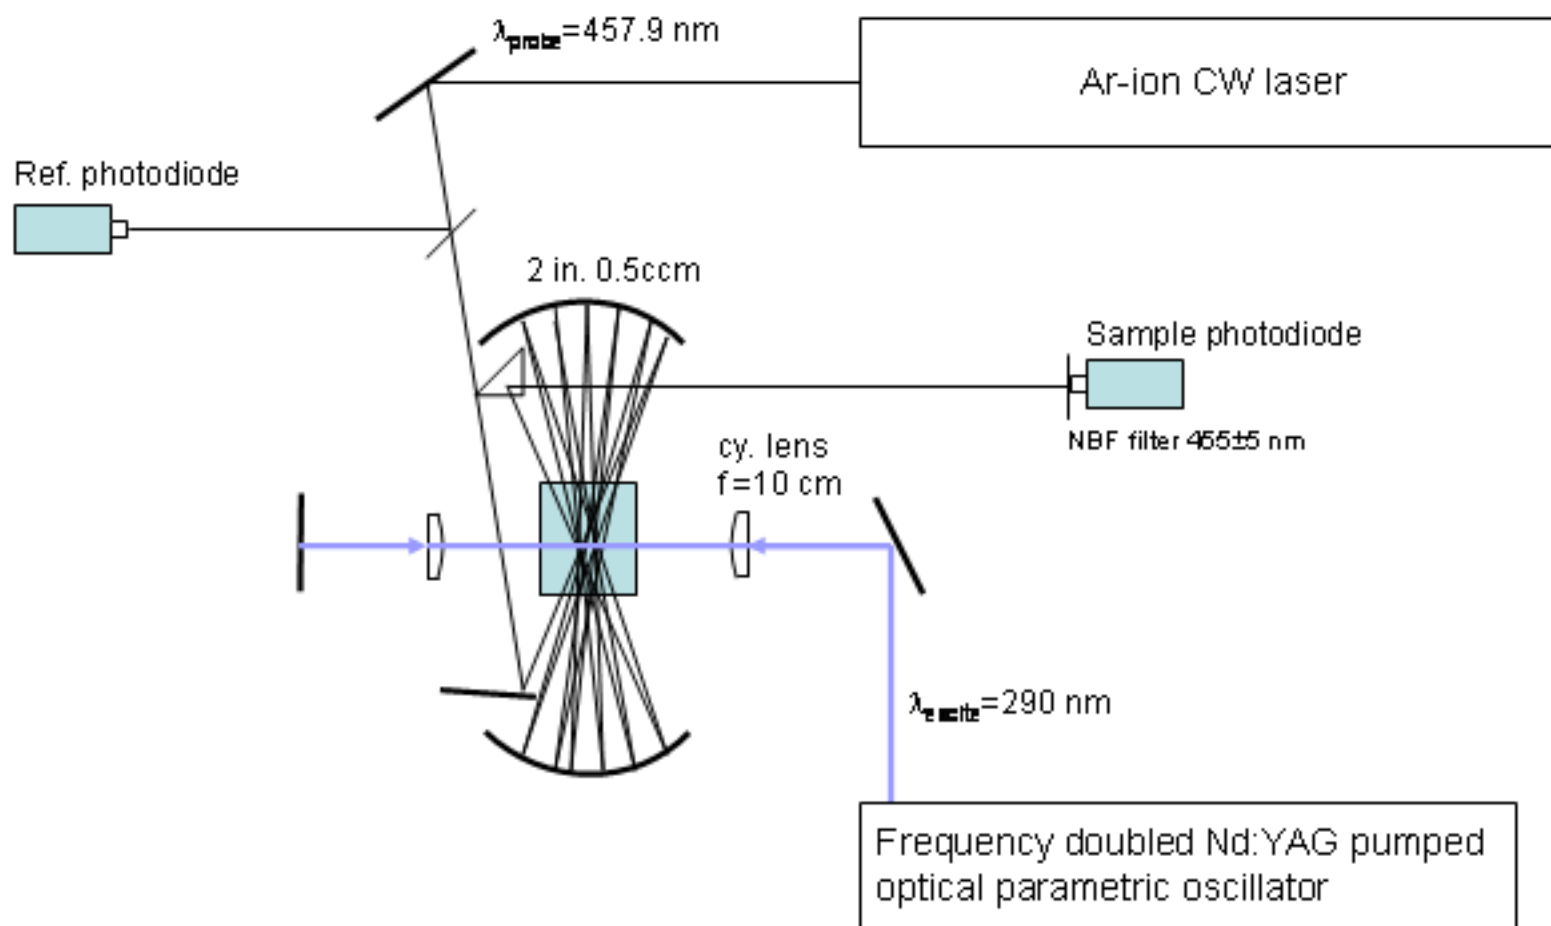

**Top view**
